# Supplementary material for: Antibody-drug conjugates plus Janus kinase inhibitors enable MHC-mismatched allogeneic hematopoietic stem cell transplantation
Source: JCI journal article supplement (doi:10.1172/jci145501), 2021-11-03
Supplement: sd1 [file 1]

**Supplemental Table 1. Flow cytometry antibodies and related reagents used in this study.**

| <b>Reagent name or target</b> | <b>Species reactivity</b> | <b>Clone</b> | <b>Fluorophore</b>                                                                                        | <b>Vendor(s)</b>                                                                           |
|-------------------------------|---------------------------|--------------|-----------------------------------------------------------------------------------------------------------|--------------------------------------------------------------------------------------------|
| Anti IgG F(ab') <sub>2</sub>  | Rabbit                    | Polyclonal   | Alexa Fluor 647                                                                                           | Cell Signaling                                                                             |
| CD3                           | Mouse                     | 145-2C11     | FITC<br>APC<br>PerCP-Cyanine5.5<br>Purified – LEAF                                                        | BioLegend<br>BioLegend<br>BioLegend<br>BioLegend                                           |
| CD4                           | Mouse                     | GK1.5        | FITC<br>PE-Cyanine7<br>APC<br>APC-eFluor 780<br>eFluor 450<br>Biotin<br>Purified – InVivoPlus             | BioLegend<br>BioLegend<br>BioLegend<br>eBioscience<br>eBioscience<br>BioLegend<br>BioXcell |
| CD4                           | Mouse                     | RM4-4        | FITC                                                                                                      | BioLegend                                                                                  |
| CD4                           | Mouse                     | RM4-5        | PerCP-Cyanine5.5                                                                                          | BioLegend                                                                                  |
| CD4                           | Human                     | RPA-T4       | FITC                                                                                                      | BioLegend                                                                                  |
| CD5                           | Mouse                     | 53-7.3       | PE                                                                                                        | BioLegend                                                                                  |
| CD8                           | Mouse                     | 53-6.7       | FITC<br>APC<br>APC-eFluor 780<br>eFluor 450<br>Brilliant Violet 510<br>BioLegend<br>Purified – InVivoPlus | BioLegend<br>BioLegend<br>eBioscience<br>eBioscience<br>BioLegend<br>BioLegend<br>BioXcell |
| CD11b                         | Mouse                     | M1/70        | FITC<br>PerCP-Cyanine5.5<br>APC                                                                           | BioLegend<br>BD<br>BioLegend                                                               |
| CD11c                         | Mouse                     | N418         | PE<br>PE-Cyanine7                                                                                         | BD<br>BD                                                                                   |

|              |             |         |                                                                                         |                                                                         |
|--------------|-------------|---------|-----------------------------------------------------------------------------------------|-------------------------------------------------------------------------|
| CD16/32      | Mouse       | 93      | Purified – Fc Block<br>PE-Cyanine7                                                      | BioLegend<br>BioLegend                                                  |
| CD19         | Mouse       | 1D3     | PerCP-Cyanine5.5                                                                        | BioLegend                                                               |
| CD25         | Mouse       | 3C7     | PE                                                                                      | BD                                                                      |
| CD28         | Mouse       | 37.51   | Purified - LEAF                                                                         | BioLegend                                                               |
| CD34         | Mouse       | HM34    | FITC                                                                                    | BioLegend                                                               |
| CD44         | Mouse/human | IM7     | Brilliant Violet 421                                                                    | BioLegend                                                               |
| CD45         | Mouse       | 30-F11  | PE                                                                                      | BD                                                                      |
| CD45         | Human       | HI30    | Purified<br>Biotin                                                                      | BioLegend<br>BioLegend                                                  |
| CD45         | Human       | BC8     | Purified<br>Biotin                                                                      | Leinco<br>Leinco                                                        |
| CD45.1       | Mouse       | A20     | PE<br>PE-Cyanine7<br>eFluor 450                                                         | BioLegend<br>BioLegend<br>eBioscience                                   |
| CD45.2       | Mouse       | 104     | Biotin<br>Brilliant Violet 421<br>Brilliant Violet 605<br>Purified – InVivoPlus         | BioLegend<br>BioLegend<br>BioLegend<br>BioXcell                         |
| CD45R (B220) | Mouse/human | RA3-6B2 | FITC<br>PerCP-Cyanine5.5<br>APC<br>APC-eFluor 780<br>eFluor 450<br>Brilliant Violet 605 | BioLegend<br>BD<br>BioLegend<br>eBioscience<br>eBioscience<br>BioLegend |
| CD48         | Mouse       | HM48-1  | APC                                                                                     | BioLegend                                                               |
| CD49b        | Mouse       | DX5     | FITC                                                                                    | BD                                                                      |
| CD62L        | Mouse       | MEL-14  | APC<br>Brilliant Violet 650                                                             | BioLegend<br>BioLegend                                                  |
| CD80         | Mouse       | 16-10A1 | BV421                                                                                   | BioLegend                                                               |

|                                   |             |              |                                                   |                                                 |
|-----------------------------------|-------------|--------------|---------------------------------------------------|-------------------------------------------------|
| CD86                              | Mouse       | GL-1         | APC-eFluor 780                                    | eBioscience                                     |
| CD117 (c-Kit)                     | Mouse       | 2B8          | Biotin                                            | BioLegend                                       |
| CD117 (c-Kit)                     | Mouse       | ACK2         | PE<br>APC-eFluor 780                              | BioLegend<br>eBioscience                        |
| CD135 (Flt3)                      | Mouse       | A2F10        | PE                                                | BioLegend                                       |
| CD150                             | Mouse       | TC15-12F12.2 | PE-Cyanine7                                       | BioLegend                                       |
| CD161 (NK1.1)                     | Mouse       | PK136        | PE<br>APC<br>PE-Cyanine7<br>Purified – InVivoPlus | BioLegend<br>BioLegend<br>BioLegend<br>BioXcell |
| CD172 (SIRPα)                     | Mouse       | P84          | APC Fire 750                                      | BioLegend                                       |
| CD184 (CXCR4)                     | Mouse       | L276F12      | Alexa Fluor 647                                   | BioLegend                                       |
| CD274 (PD-L1)                     | Mouse       | MIH1         | APC-eFluor 780                                    | eBioscience                                     |
| CD336 (NKp46)                     | Mouse       | 29A1.4       | PE<br>PerCP-Cyanine5.5                            | BioLegend<br>BioLegend                          |
| CFSE                              | N/A         | N/A          | CFSE                                              | BioLegend                                       |
| F4/80                             | Mouse       | BM8          | Brilliant Violet 421                              | BioLegend                                       |
| FcεRIα                            | Mouse       | 1-Mar        | PE-Cyanine7                                       | BioLegend                                       |
| FoxP3                             | Mouse       | FJK-16       | APC                                               | eBioscience                                     |
| Granzyme A                        | Mouse       | 3G8.5        | PE                                                | BioLegend                                       |
| Granzyme B                        | Mouse/human | GB11         | Pacific Blue                                      | BioLegend                                       |
| IgG2a,κ Isotype, rat              | N/A         | 2A3          | Purified – InVivoPlus                             | BioXcell                                        |
| IgG2a,κ Isotype, mouse            | N/A         | C1.18.4      | Purified – InVivoPlus                             | BioXcell                                        |
| IgG2b,κ Isotype, rat              | N/A         | LTF-2        | Purified – InVivoPlus                             | BioXcell                                        |
| H-2D <sup>d</sup>                 | Mouse       | 34-2-12      | Biotin<br>Brilliant Violet 421                    | BioLegend<br>BD                                 |
| H-2K <sup>b</sup> /D <sup>b</sup> | Mouse       | 28-8-6       | PE-Cyanine7                                       | BioLegend                                       |
| H-2K <sup>b</sup>                 | Mouse       | AF6-88.5     | FITC<br>PE<br>PE-Cyanine7                         | BD<br>BioLegend<br>BioLegend                    |

|                                                          |              |                                                               |                                                          |                                                          |
|----------------------------------------------------------|--------------|---------------------------------------------------------------|----------------------------------------------------------|----------------------------------------------------------|
| <b>H-2K<sup>d</sup></b>                                  | <b>Mouse</b> | <b>SF1-1.1</b>                                                | <b>FITC</b><br><b>APC</b><br><b>Brilliant Violet 421</b> | <b>BioLegend</b><br><b>BioLegend</b><br><b>BioLegend</b> |
| <b>I-A<sup>b</sup></b>                                   | <b>Mouse</b> | <b>AF6-120.1</b>                                              | <b>PE</b>                                                | <b>BioLegend</b>                                         |
| <b>IFN<math>\gamma</math></b>                            | <b>Mouse</b> | <b>XMG1.2</b>                                                 | <b>APC</b>                                               | <b>BioLegend</b>                                         |
| <b>Lineage cocktail (CD3, Gr1, B220, TER-119, CD11b)</b> | <b>Mouse</b> | <b>17A2,<br/>RB6-8C6,<br/>RA3-6B2,<br/>TER-119,<br/>M1/70</b> | <b>Pacific Blue</b>                                      | <b>BioLegend</b>                                         |
| <b>Ly-6A/E (Sca1)</b>                                    | <b>Mouse</b> | <b>D7</b>                                                     | <b>FITC</b><br><b>PE</b><br><b>Brilliant Violet 605</b>  | <b>BioLegend</b><br><b>BD</b><br><b>BioLegend</b>        |
| <b>Ly-6G/Ly-6C (Gr1)</b>                                 | <b>Mouse</b> | <b>RB6-8C5</b>                                                | <b>FITC</b><br><b>APC</b><br><b>APC-eFluor 780</b>       | <b>BD</b><br><b>BioLegend</b><br><b>eBioScience</b>      |
|                                                          |              |                                                               | <b>PerCP-Cyanine5.5</b>                                  | <b>BioLegend</b>                                         |
| <b>Ly-6C</b>                                             | <b>Mouse</b> | <b>HK1.4</b>                                                  | <b>Brilliant Violet 421</b>                              | <b>BioLegend</b>                                         |
| <b>Ly-6G</b>                                             | <b>Mouse</b> | <b>1A8</b>                                                    | <b>PerCP-Cyanine5.5</b>                                  | <b>BioLegend</b>                                         |
|                                                          |              |                                                               | <b>APC-Cy7</b>                                           | <b>BioLegend</b>                                         |
| <b>Perforin</b>                                          | <b>Mouse</b> | <b>S16009A</b>                                                | <b>APC</b>                                               | <b>BioLegend</b>                                         |
| <b>Phospho-Stat1 (Y701)</b>                              | <b>Mouse</b> | <b>58D6</b>                                                   | <b>Purified</b>                                          | <b>Cell Signaling</b>                                    |
| <b>Phospho-Stat3 (Y705)</b>                              | <b>Mouse</b> | <b>13A3-1</b>                                                 | <b>Brilliant Violet 421</b>                              | <b>BioLegend</b>                                         |
| <b>Phospho-Stat5 (Y694)</b>                              | <b>Mouse</b> | <b>47</b>                                                     | <b>PE</b>                                                | <b>BD</b>                                                |
| <b>Siglec F</b>                                          | <b>Mouse</b> | <b>S17007L</b>                                                | <b>PE</b>                                                | <b>BioLegend</b>                                         |
| <b>Streptavidin</b>                                      | <b>N/A</b>   | <b>N/A</b>                                                    | <b>Alexa Fluor 488</b><br><b>Brilliant Violet BV421</b>  | <b>Invitrogen</b><br><b>BD</b>                           |
| <b>TCR<math>\beta</math></b>                             | <b>Mouse</b> | <b>H57-597</b>                                                | <b>PE-Cyanine7</b>                                       | <b>BioLegend</b>                                         |
| <b>TCR<math>\gamma\delta</math></b>                      | <b>Mouse</b> | <b>GL3</b>                                                    | <b>Brilliant Violet 421</b>                              | <b>BioLegend</b>                                         |
| <b>TER-119</b>                                           | <b>Mouse</b> | <b>TER-119</b>                                                | <b>FITC</b>                                              | <b>BioLegend</b>                                         |

|                         |            |            |                                                            |                                                          |
|-------------------------|------------|------------|------------------------------------------------------------|----------------------------------------------------------|
| <b>Viability stains</b> | <b>N/A</b> | <b>N/A</b> | <b>7-AAD</b><br><b>Zombie Aqua</b><br><b>Zombie Violet</b> | <b>BioLegend</b><br><b>BioLegend</b><br><b>BioLegend</b> |
|-------------------------|------------|------------|------------------------------------------------------------|----------------------------------------------------------|

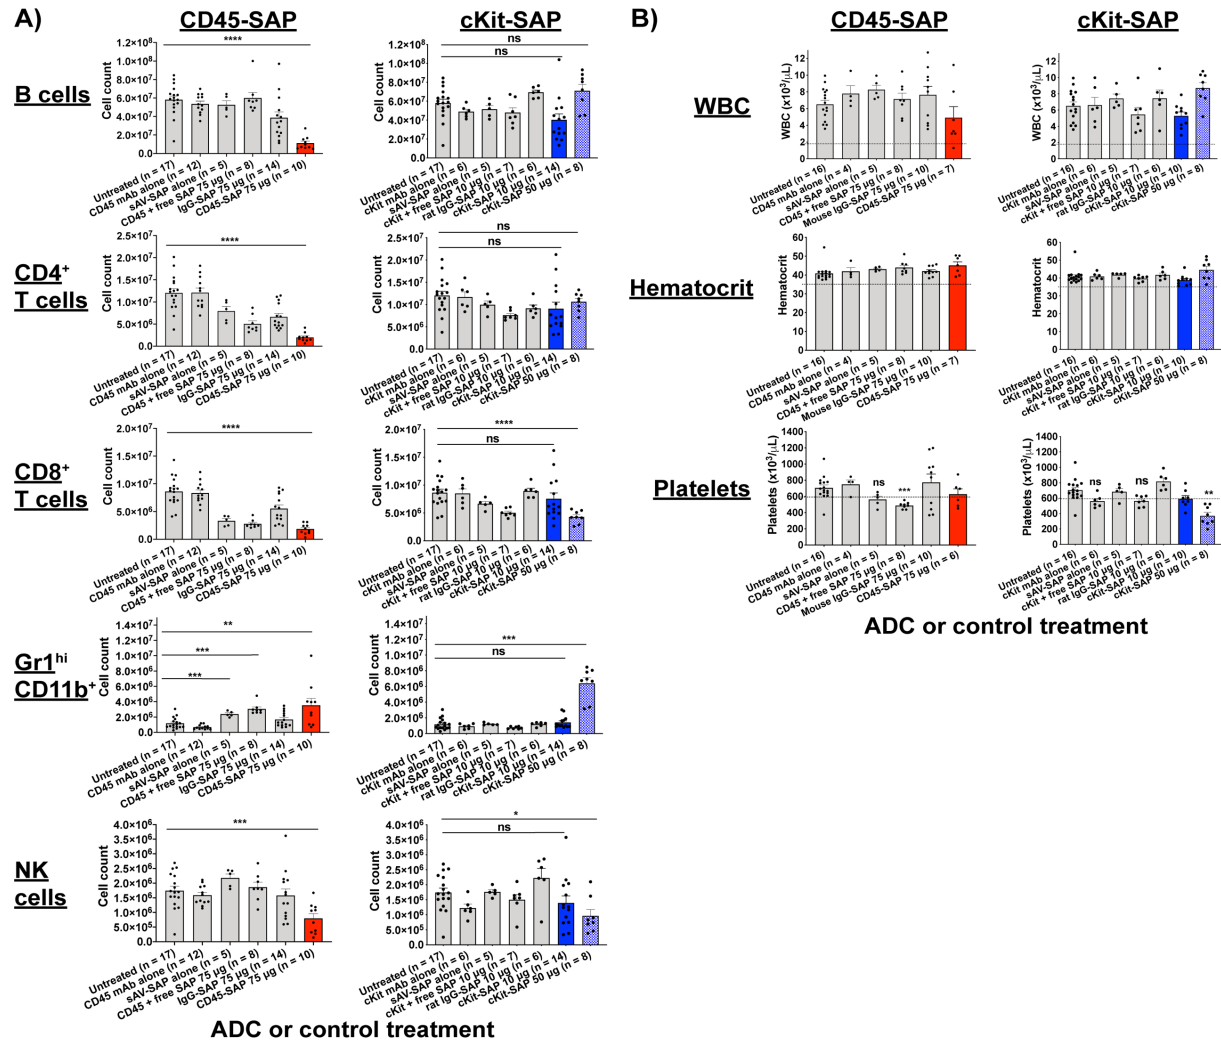

**Supplemental Figure 1. Acute hematologic effects of cKit-SAP and CD45-SAP conditioning.** (A and B) Absolute leukocyte counts by subset in mouse spleen (A) and CBCs (B) 7 days after administration of CD45-SAP, cKit-SAP, or control conjugates and treatments. Dotted lines in Panel B are the lower reference limits for the for the CBC assays; groups whose means were statistically below the lower reference limit are indicated. Please note that the same cohort of untreated mice was used to compare with mice in the CD45-SAP and cKit-SAP groups. Data are presented as mean  $\pm$  SEM of the indicated numbers of mice pooled from 2-4 experiments. One-way ANOVA (Panel A – all cKit groups and CD45-SAP - Myeloid group) and Student's *t* test (all other groups) were used for statistical comparisons; ns = not significant, \* =  $p < 0.05$ , \*\* =  $p < 0.01$ , \*\*\* =  $p < 0.001$ , and \*\*\*\* =  $p < 0.0001$ .

### A) Primary syngeneic transplant

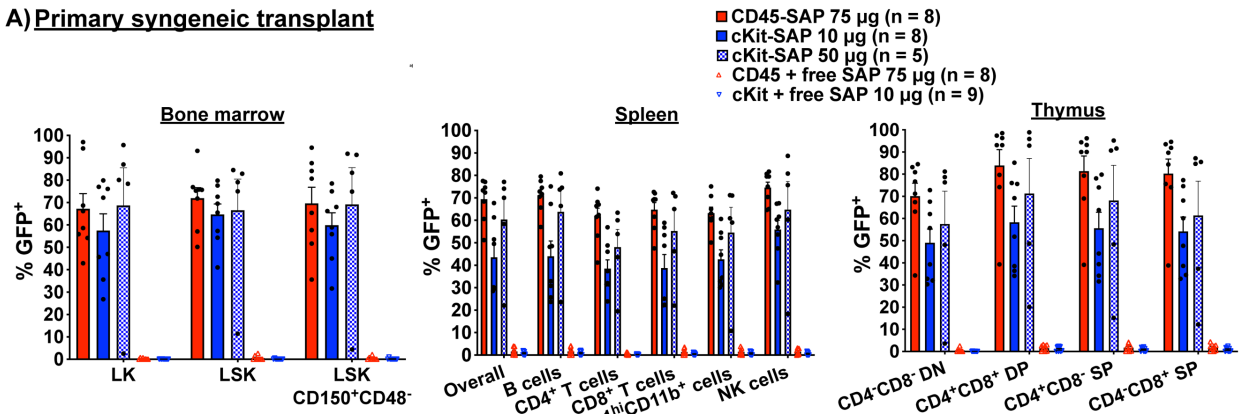

### B) Secondary syngeneic transplant

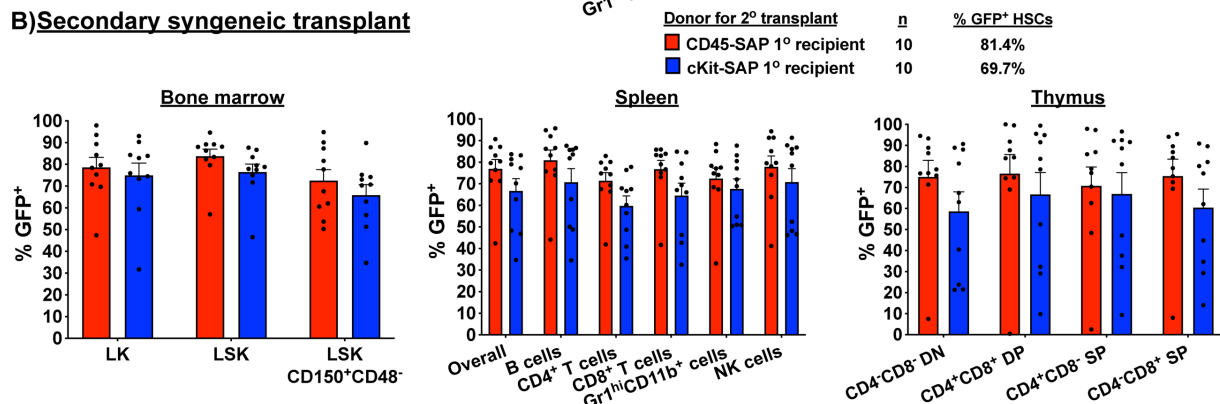

**Supplemental Figure 2. Donor engraftment in lymphoid organs of primary and secondary syngeneic HSCT recipients.** (A) Donor chimerism by cell subset in bone marrow, spleen and thymus 6 months after primary syngeneic (B6-GFP→B6) HSCT; these data correspond to the peripheral blood donor chimerism shown in Figure 1C, and include mice pooled from 2-3 experiments. For thymus, DN = double negative. DP = double positive, SP = single positive. (B) Donor chimerism in bone marrow, spleen, and thymus 4 months after secondary transplantation of bone marrow obtained from B6-GFP→B6 primary recipients to a new cohort of lethally-irradiated B6 mice. These data correspond to the peripheral blood donor chimerism shown in Figure 1E, and include mice pooled from 2 experiments. The percentages of GFP<sup>+</sup> HSCs (donor-derived HSCs from primary transplant recipients) that were infused into the secondary recipients is provided. Data points and error bars represent mean ± SEM.

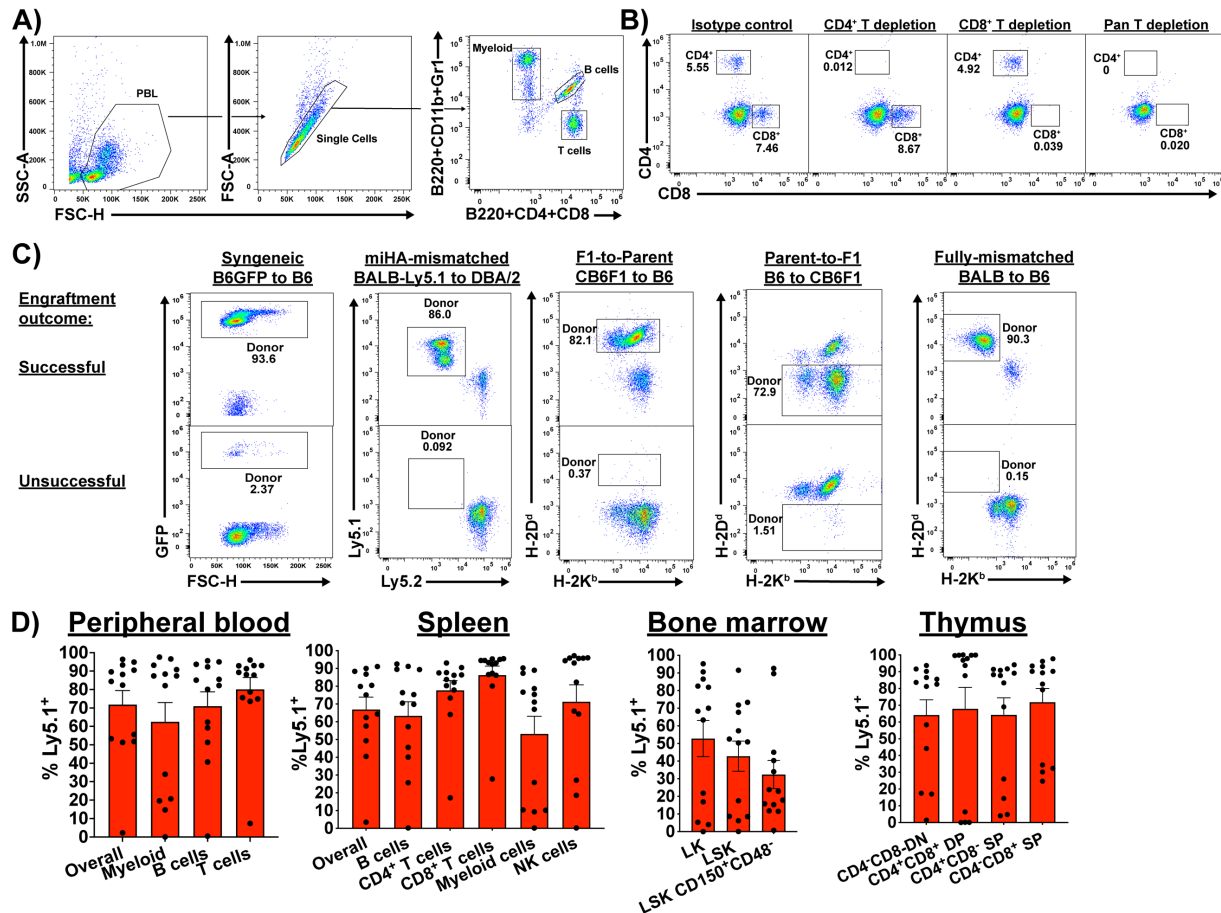

**Supplemental Figure 3. Donor engraftment in lymphoid organs of CD45-SAP conditioned, miHA-mismatched transplant recipients.** (A) Gating strategy for identifying B, T, and myeloid lineage cells in donor chimerism analysis. (B) Confirmation of pre-transplant T cell depletion in peripheral blood of mice receiving 250  $\mu$ g  $\alpha$ CD4,  $\alpha$ CD8, or both depleting antibodies per day for three days. (C) Sample FACS plots illustrating identification of donor and recipient derived peripheral blood cells for all HSCT models used in this study. (D)  $10^7$  whole bone marrow cells isolated from BALB/c-Ly5.1 $\rightarrow$ DBA/2 mixed chimeras were infused to a new cohort of lethally-irradiated DBA/2 mice. The percentage of Ly5.1<sup>+</sup> HSCs (donor-derived HSCs from primary recipients) that were infused into secondary recipients was ~70% (76% and 64.5% for two independent serial transfer experiments). Donor chimerism in peripheral blood, bone marrow, spleen, and thymus were assessed at 4 months post-transplant. Data in Panel D represent mean  $\pm$  SEM of 13 recipient mice pooled from 2 experiments.

**A)**

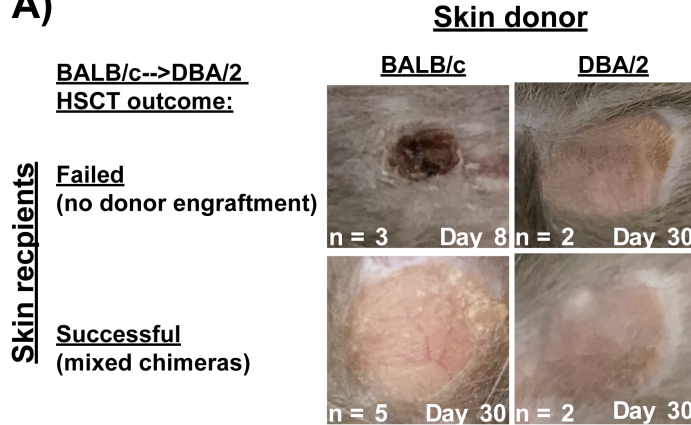

**B)**

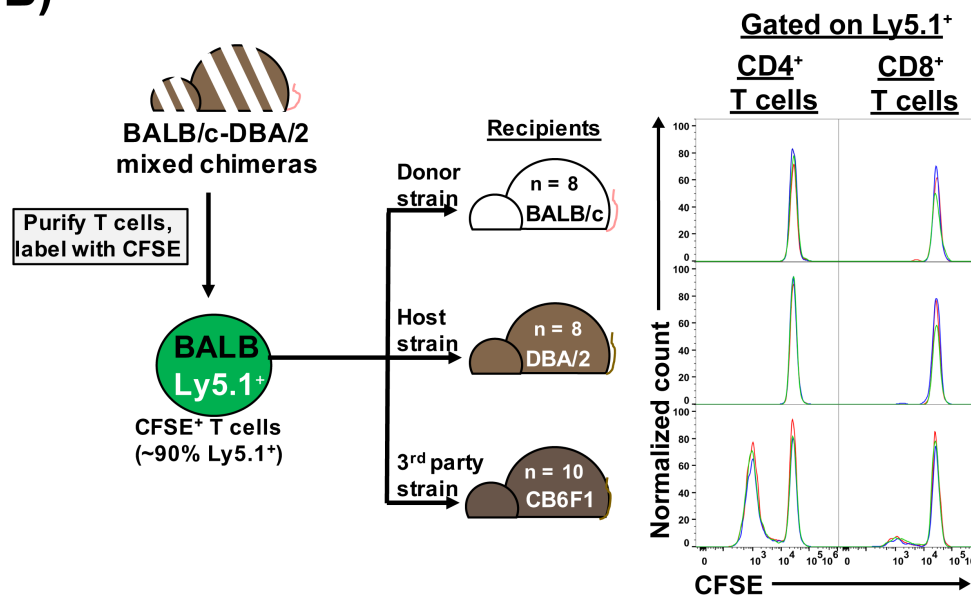

**Supplemental Figure 4. BALB/c→DBA/2 mixed chimeras are cross-tolerant to donor and recipient-derived antigen. (A)** BALB/c or DBA/2 ear skin was surgically engrafted at 6 months post-HSCT to CD45-SAP-conditioned, BALB/c→DBA/2 recipients that had either rejected or successfully engrafted donor HSCs. Skin grafts were monitored 30 days for signs of rejection; inset text indicates the number of skin graft recipients analyzed across two experiments (lower left) and the time post-skin graft when images were acquired (lower right). **(B)** In vivo MLRs in which CFSE labeled T cells from BALB/c-DBA/2 mixed chimeras were infused to BALB/c, DBA/2, or CB6F1 mice. The indicated numbers of recipient mice per group were analyzed across two experiments, with CFSE histograms from three representative mice per group presented.

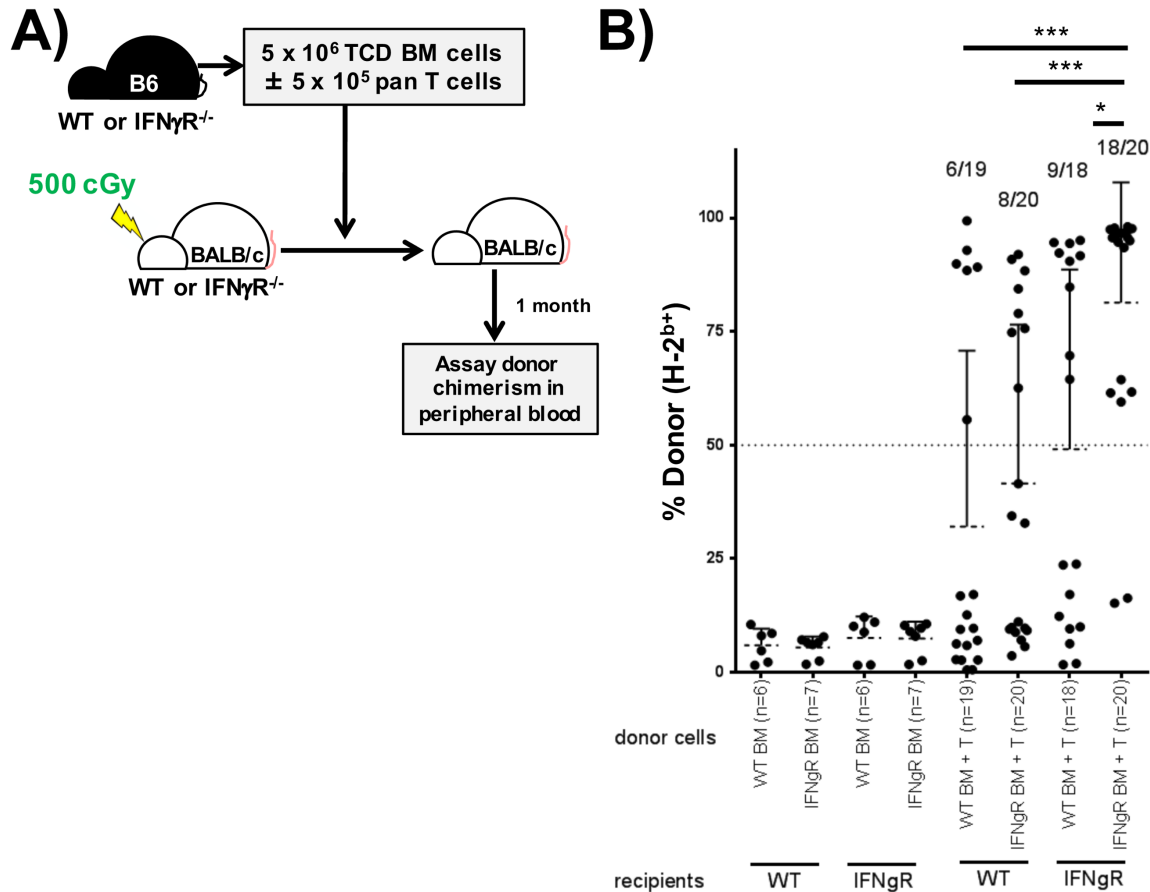

**Supplemental Figure 5. Deficiency of IFN $\gamma$  signaling permits engraftment of fully-mismatched HSCs in allo-HSCT with reduced intensity conditioning. (A)** Schema for a RIC allo-HSCT model in which WT or IFN $\gamma$ R<sup>-/-</sup> BALB/c recipients were sublethally irradiated then transplanted with bone marrow with or without T cells from WT or IFN $\gamma$ R<sup>-/-</sup> B6 mice. **(B)** Peripheral blood chimerism 1 month post-HSCT. Results are pooled from three independent experiments; the frequency of mice in each group with greater than 50% donor chimerism is indicated above each dataset. One-way ANOVA was used for statistical comparisons, \* =  $p < 0.05$ , \*\* =  $p < 0.01$ , \*\*\* =  $p < 0.001$ , and \*\*\*\* =  $p < 0.0001$

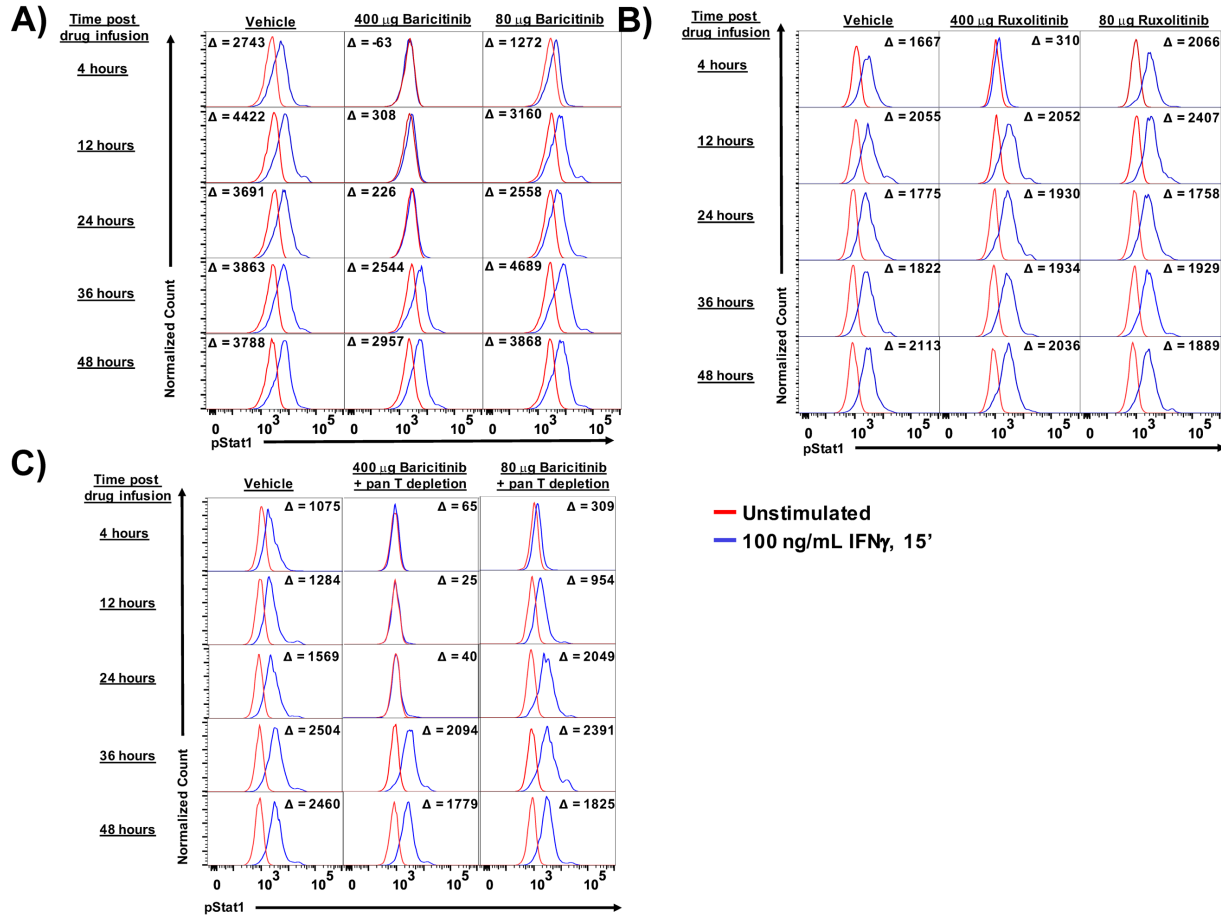

**Supplemental Figure 6. Pharmacodynamics of subcutaneously-administered baricitinib and ruxolitinib.**

(A and B) B6 mice received a single subcutaneous injection of baricitinib (A) or ruxolitinib (B) at 400  $\mu$ g or 80  $\mu$ g per mouse, and Stat1 phosphorylation of whole blood leukocytes (CD45<sup>+</sup> gated) in response to IFN $\gamma$  stimulation was assayed at the indicated times post-drug infusion. (C) Mice received 250  $\mu$ g of both  $\alpha$ CD4 and  $\alpha$ CD8 depleting antibodies per day for three days prior to baricitinib injection, then analyzed as in Panel A. For all panels, data from a single mouse in each treatment group are displayed and are representative of 2 (vehicle groups) or 4 (baricitinib and ruxolitinib groups) mice analyzed over two experiments. Inset numbers are the MFI differences between IFN $\gamma$ -stimulated and unstimulated samples.

A)

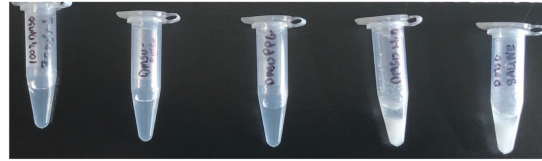

**Vehicle:**

100% DMSO    50% DMSO / 50% PEG-400    50% DMSO / 50% PPG    50% DMSO / 50% H<sub>2</sub>O    50% DMSO / 50% NS

**Soluble after 30 days at 37°C:**

+    +    +    -    -

**Compatible with osmotic pumps:**

-    +    +    +    +

B)

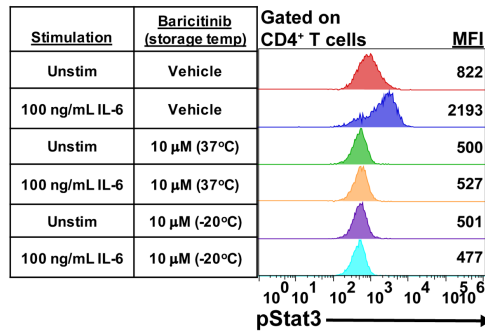

C)

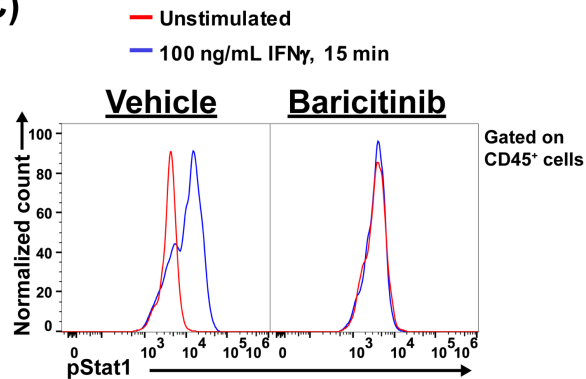

**Supplemental Figure 7. Baricitinib is compatible with in vivo drug delivery via osmotic pump.** (A) Solubility of baricitinib (70 mg/mL) in various solvents after 30 days incubation at 37°C. Vehicle compatibility with osmotic pumps is as per the manufacturer. PEG = polyethylene glycol; PPG = polypropylene glycol; NS = normal saline (0.9% NaCl). (B) Baricitinib in 50% DMSO/50% PEG-400 that had been incubated at 37°C for 30 days was then tested for inhibitory activity against IL-6-induced Stat3 phosphorylation in human peripheral blood CD4<sup>+</sup> T cells. (C) B6 mice implanted with baricitinib- or vehicle-loaded osmotic pumps were assayed immediately prior to HSCT (four days post-pump implantation) for IFN $\gamma$ -induced Stat1 phosphorylation using a whole blood assay.

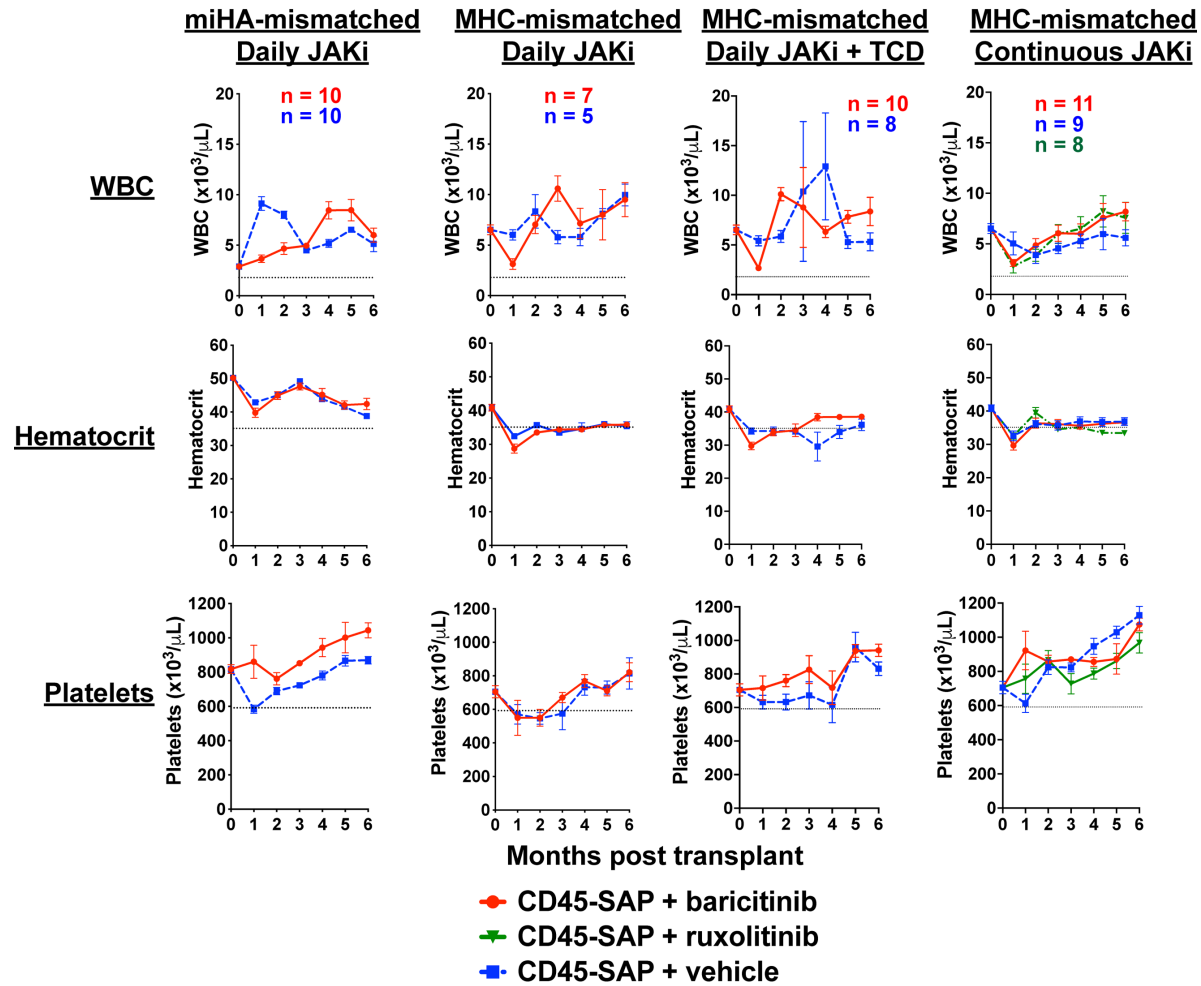

**Supplemental Figure 8. Complete blood counts in miHA-mismatched and MHC-mismatched (F1-to-parent) HSCT models conditioned with CD45-SAP and JAK1/2 inhibitors.** WBC, hematocrit and platelet counts for miHA- and MHC- mismatched allo-HSCT models dosed daily with baricitinib (left two columns), MHC-mismatched allo-HSCT receiving pre-transplant CD4<sup>+</sup> and CD8<sup>+</sup> T cell depletion (TCD) plus daily baricitinib (third column), and MHC-mismatched allo-HSCT receiving continuously infused baricitinib or ruxolitinib via osmotic pump (right column). Dotted lines indicate the lower reference limits for the CBC assays. Insets indicate the numbers of mice analyzed per group, which were pooled from 2-3 experiments. Data points and error bars represent mean  $\pm$  SEM.

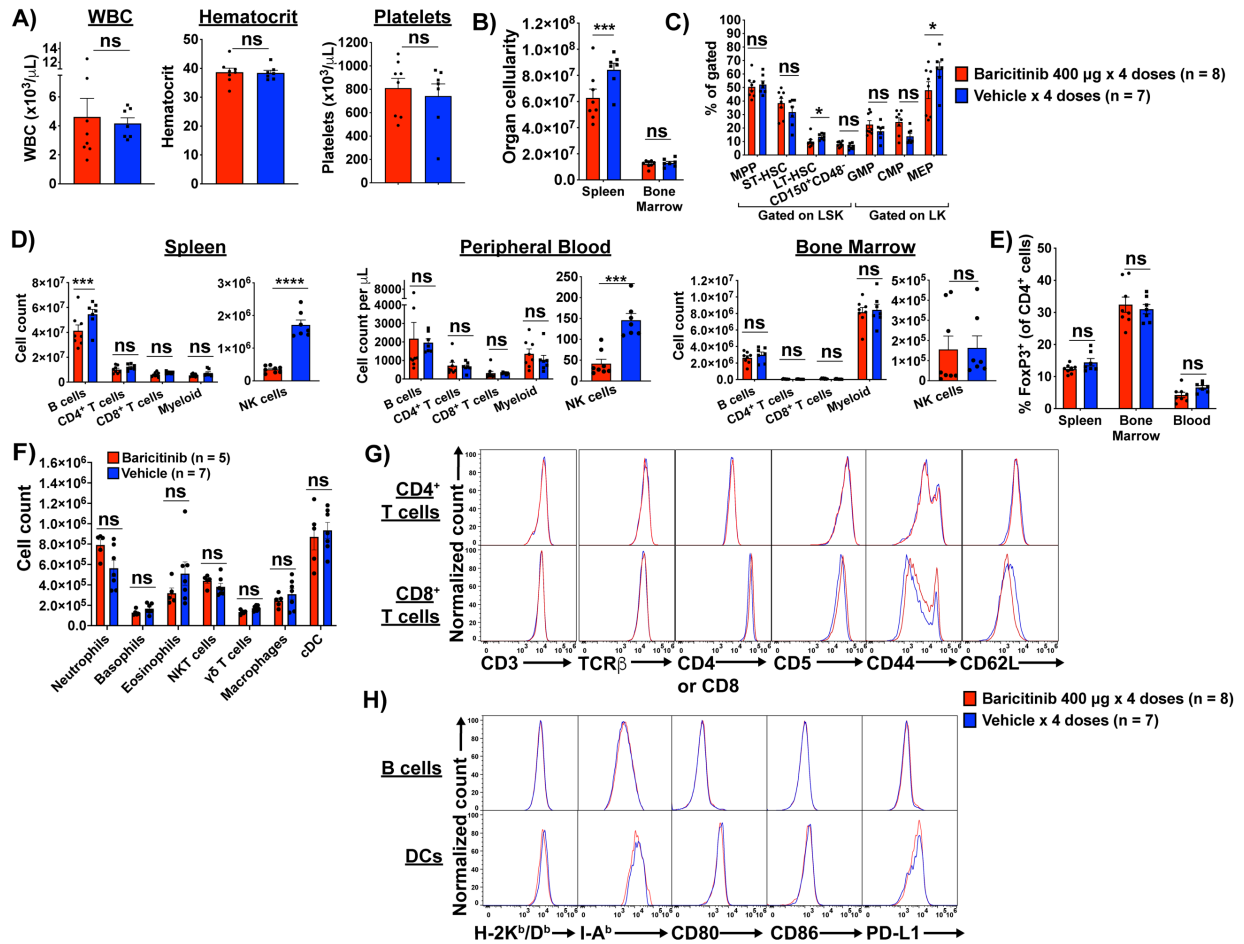

**Supplemental Figure 9. Acute effects of baricitinib on the pre-HSCT recipient.** B6 mice were treated daily with baricitinib or vehicle for 4 days prior to analysis of blood and lymphoid organs. The color scheme in the legend (upper-right) is used throughout the figure. **(A and B)** CBCs (A) and organ cellularity (B). **(C)** Proportions of HSPC subsets in bone marrow. **(D)** Absolute B, T, myeloid (Gr1<sup>+</sup> and/or CD11b<sup>+</sup>), and NK cell counts in spleen, blood, and bone marrow. **(E)** Frequencies of FoxP3<sup>+</sup> Tregs (of total CD4<sup>+</sup> T cells) in spleen, blood and bone marrow. **(F)** Absolute counts of splenic neutrophils (Ly6G<sup>hi</sup>Siglec F<sup>-</sup>), eosinophils (Ly6G<sup>lo</sup>Siglec F<sup>+</sup>), basophils (DX5<sup>+</sup>FcεRIα<sup>+</sup>), NKT cells (CD3<sup>+</sup>NK1.1<sup>+</sup>), γδ T cells (CD3<sup>+</sup>TCRγδ<sup>+</sup>), macrophages (CD11b<sup>+</sup>F4/80<sup>+</sup>), and conventional dendritic cells (cDC; B220-CD11c<sup>+</sup>MHCII<sup>hi</sup>) **(G and H)** Splenic T cell (G) and APC (H) phenotyping. Data points and error bars represent mean ± SEM, with the indicated numbers of mice pooled across 3 experiments. The Mann-Whitney *U* test (Panel A – WBC and Platelets, Panel C – LT-HSC group, Panel D – Peripheral Blood group) or Student's *t* test (all other groups) were used for statistical comparisons: ns = not significant, \* is *p* < 0.05, \*\* is *p* < 0.01, \*\*\* is *p* < 0.001, and \*\*\*\* is *p* < 0.0001.

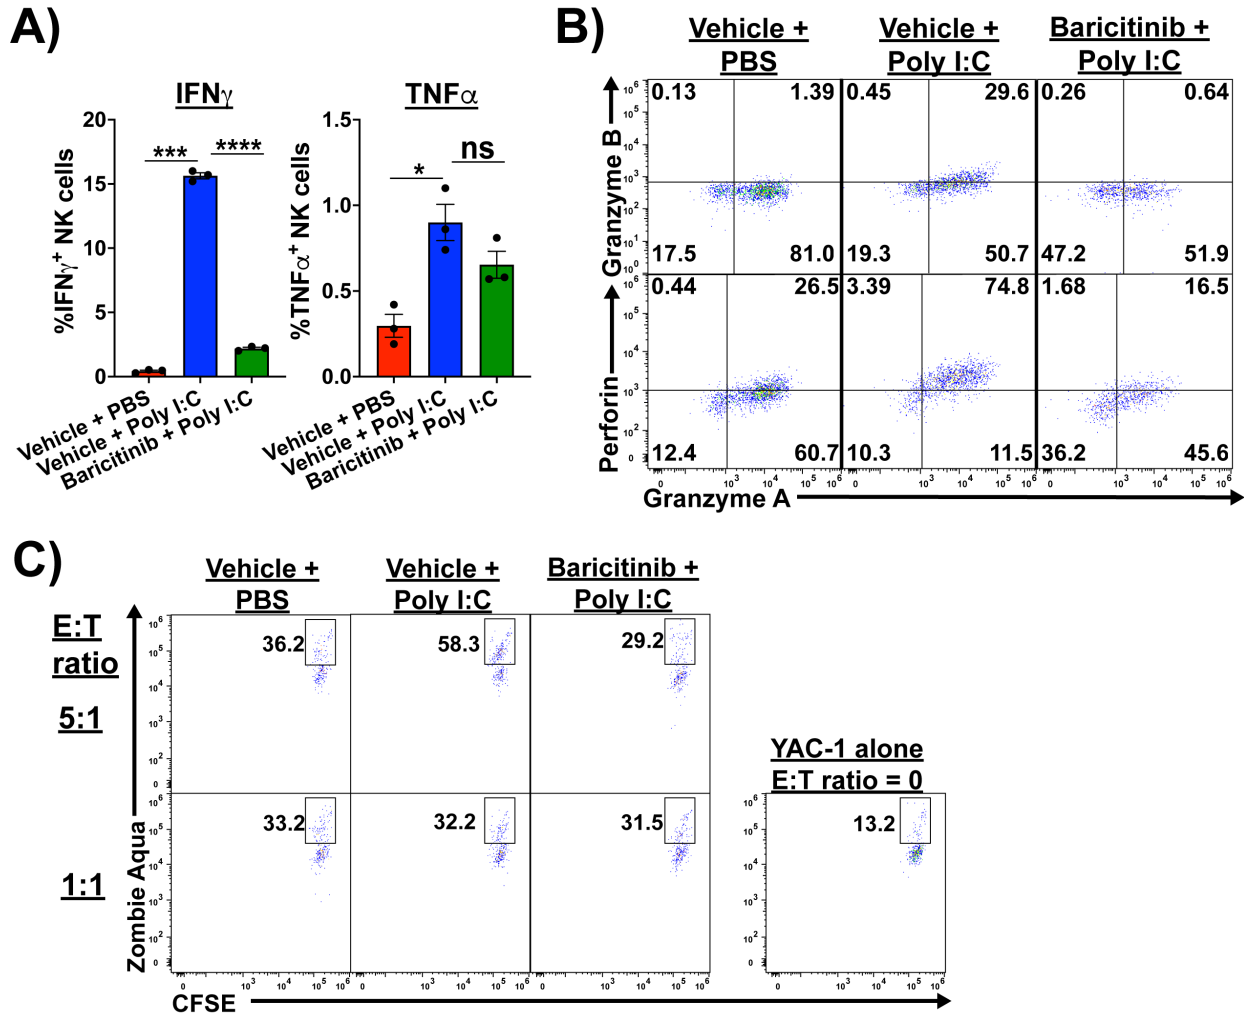

**Supplemental Figure 10. In vivo baricitinib treatment inhibits NK cell cytokine production and cytotoxicity.** (A-C) Functional assays of NK cells stimulated in vivo with Poly I:C (or receiving PBS as a control) after four doses of baricitinib or vehicle: intracellular cytokine staining after a 4-hour stimulation (A; three technical replicates per group) and cytolytic enzyme expression plus cytotoxicity assay after a 24-hour stimulation (B and C). For Panel A, data from one representative mouse of 2 (PBS group) or 5 (Poly I:C groups) mice from three experiments are presented. For Panels B and C, data from one representative mouse of 3 (PBS group) or 6 (Poly I:C groups) mice from three experiments are presented. Data points and error bars represent mean  $\pm$  SEM. One-way ANOVA was used for statistical comparisons; ns = not significant, \* is  $p < 0.05$ , \*\* is  $p < 0.01$ , \*\*\* is  $p < 0.001$ , and \*\*\*\* is  $p < 0.0001$ .

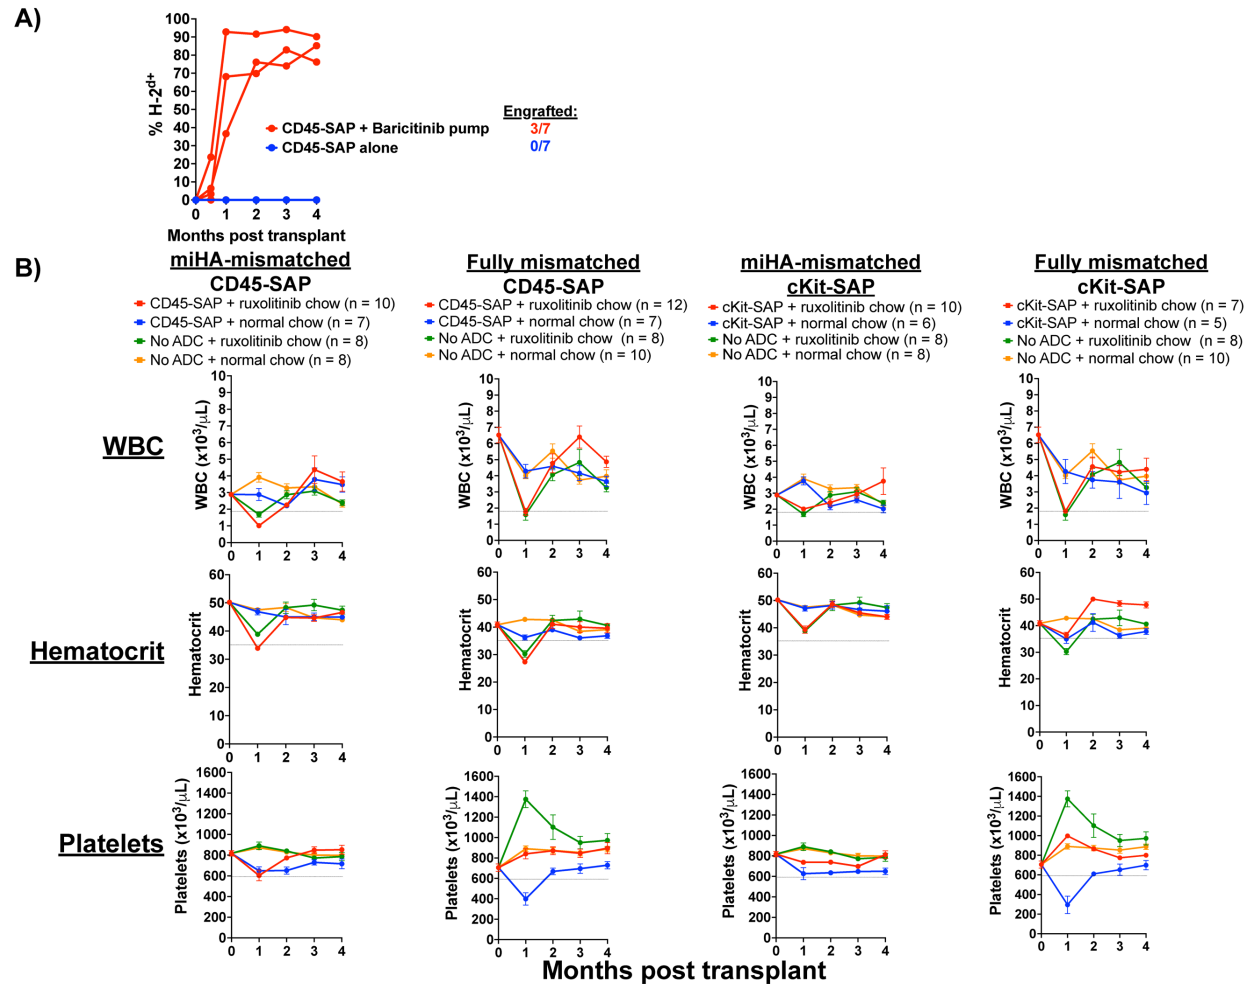

**Supplemental Figure 11. Donor chimerism in fully MHC-mismatched HSCT with baricitinib pumps and CBCs after conditioning with ADCs plus ruxolitinib chow. (A)** B6 recipient mice were conditioned with CD45-SAP plus baricitinib infused continuously via osmotic pumps (drug dosing as per Figure 3E), then transplanted with  $20 \times 10^6$  BALB/c bone marrow cells. Each line represents one transplant recipient. **(B)** Serial CBCs for allo-HSCT experiments described in Figure 6. Dotted lines indicate the lower reference limits for the CBC assays, and data points and error bars represent mean  $\pm$  SEM. For both panels, legends indicate the numbers of mice analyzed per group, which were pooled from 2-3 experiments.

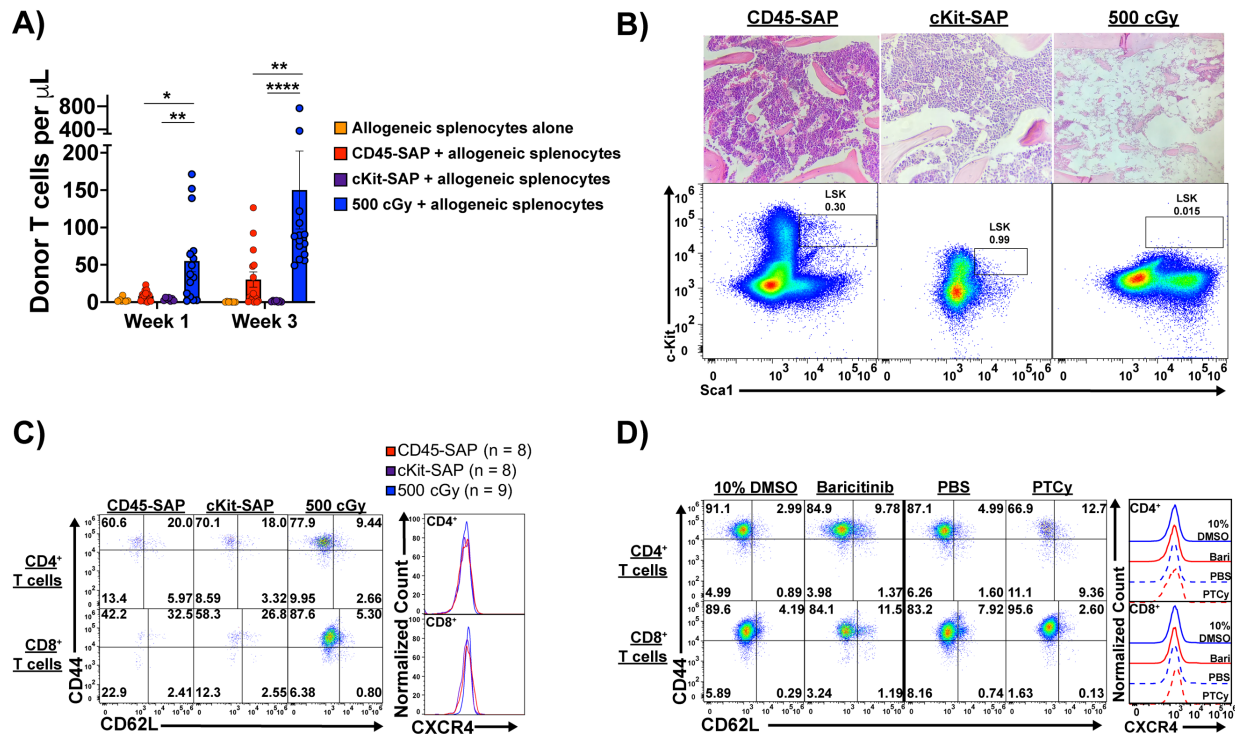

**Supplemental Figure 12. Circulating T cell counts, bone marrow analysis, and splenic donor T cell phenotyping in graft-versus-host alloreactivity model. (A)** Circulating donor T cells at Weeks 1 and 3 post-splenocyte infusion in CB6F1 recipients receiving TBI- versus ADC-based conditioning. **(B)** Histology (upper panels; 10X objective) and flow cytometry (lower panels; gated on viable Lin<sup>-</sup> cells) of bone marrow from CD45-SAP or cKit-SAP conditioned mice 8 weeks after allogeneic splenocyte infusion, compared with that of an irradiated mouse that succumbed at 3 weeks post-splenocyte infusion. **(C and D)** CD44, CD62L, and CXCR4 expression on donor T cells 1 week post-splenocyte infusion in recipients conditioned with TBI or ADCs as per Figure 7 (C), or in sublethally irradiated recipients treated with the indicated drugs as per Figure 8 (D). The Kruskal-Wallis test was used for statistical comparisons; ns = not significant, \* is  $p < 0.05$ , \*\* is  $p < 0.01$ , \*\*\* is  $p < 0.001$ , and \*\*\*\* is  $p < 0.0001$ .
